# Supplementary material for: In silico analysis of all point mutations on the 2B domain of K5/K14 causing epidermolysis bullosa simplex: a genotype–phenotype correlation
Source: Royal Society of Chemistry journal article supplement (doi:10.1039/c4mb00138a), 2014-07-02
Supplement: c4mb00138a1.pdf [file c4mb00138a1.pdf]

## Supplementary information

**Supp. Table S1. A Complete List of Softwares Used for Computational Analysis of Assorted Point Mutations of K5/K14 from Published Resources.**

| Service name                        | URL                                                                                                                   | Reference                                                             |
|-------------------------------------|-----------------------------------------------------------------------------------------------------------------------|-----------------------------------------------------------------------|
| <b>Stability changes prediction</b> |                                                                                                                       |                                                                       |
| CUPSAT                              | <a href="http://cupsat.tu-bs.de/">http://cupsat.tu-bs.de/</a>                                                         | (Parthiban V, Gromiha MM and Schomburg D, 2006)                       |
| PopMusic                            | <a href="http://babylone.ulb.ac.be/popmusic">http://babylone.ulb.ac.be/popmusic</a>                                   | (Dehouck Y, Grosfils A, Folch B, et al., 2009)                        |
| <b>Pathogenic or not</b>            |                                                                                                                       |                                                                       |
| PolyPhen-2                          | <a href="http://genetics.bwh.harvard.edu/pph2/">http://genetics.bwh.harvard.edu/pph2/</a>                             | (Adzhubei I, Jordan DM, Sunyaev SR, 2013)                             |
| SIFT                                | <a href="http://sift.jcvi.org/">http://sift.jcvi.org/</a>                                                             | (Kumar P, Henikoff S, Ng PC, 2009)                                    |
| <b>Multiple sequence alignment</b>  |                                                                                                                       |                                                                       |
| ClustalW                            | <a href="http://www.ebi.ac.uk/Tools/msa/clustalw2/">http://www.ebi.ac.uk/Tools/msa/clustalw2/</a>                     | (Kuo-Bin Li, 2003)                                                    |
| <b>Interatomic interaction</b>      |                                                                                                                       |                                                                       |
| Ligplot                             | <a href="http://www.ebi.ac.uk/thornton-srv/software/LIGPLOT/">http://www.ebi.ac.uk/thornton-srv/software/LIGPLOT/</a> | (Wallace A C, Laskowski R A, Thornton J M., 1996)                     |
| CMA/CSU                             | <a href="http://ligin.weizmann.ac.il/cma/">http://ligin.weizmann.ac.il/cma/</a>                                       | (Sobolev V., Sorokine A., Prilusky J., et al., 1999)                  |
| ESBRI                               | <a href="http://bioinformatica.isa.cnr.it/ESBRI/">http://bioinformatica.isa.cnr.it/ESBRI/</a>                         | (Sarakatsannis J.N., Duan Y, 2005)                                    |
| <b>Steric clash</b>                 |                                                                                                                       |                                                                       |
| Chimera                             | <a href="https://www.cgl.ucsf.edu/chimera/">https://www.cgl.ucsf.edu/chimera/</a>                                     | (Eric F. Pettersen, Thomas D. Goddard, Conrad C. Huang, et al., 2004) |

**Supp. Table S2. Characterized groups of all point mutations on 2B domain of K5/K14.**

| Group                                                  | Mutation                   |
|--------------------------------------------------------|----------------------------|
| Same position<br>Different A.A.<br>Different phenotype | K5-A428T/V                 |
|                                                        | K5-I467L/T/M               |
|                                                        | K14-R388C/G/H/P            |
|                                                        | K14-I412E/N<br>K14-A413T/P |
| Same position<br>Same A.A.<br>Different phenotype      | K5-E475K/G                 |
|                                                        | K14-I377N/T                |
|                                                        | K14-R388C/H/P              |
| Same position<br>Different A.A.<br>Same phenotype      | K14-I377N                  |
|                                                        | K14-E381K                  |
|                                                        | K14-E411K                  |
|                                                        | K14-Y415H                  |
| Single mutation                                        | K5-K404E                   |
|                                                        | K5-A438D                   |
|                                                        | K5-K443N                   |
|                                                        | K5-L463P                   |
|                                                        | K5-E466D                   |
|                                                        | K5-T469P                   |
|                                                        | K5-R471C                   |
|                                                        | K5-G476D                   |
|                                                        | K14-L384P                  |
|                                                        | K14-L401P                  |
|                                                        | K14-L408M                  |
|                                                        | K14-R416P                  |
|                                                        | K14-R417P                  |
|                                                        | K14-L418V                  |
|                                                        | K14-L419Q                  |

**Supp. Table S3. Probable rotamers and corresponding interatomic clashes predicted with UCSF Chimera.**

|           |                                                                                                                            |
|-----------|----------------------------------------------------------------------------------------------------------------------------|
| K5-K404E  | R1 (0.196): No Clash.                                                                                                      |
|           | R2 (0.162): No Clash.                                                                                                      |
|           | R3 (0.082): No Clash.                                                                                                      |
|           | R4 (0.082): Three contacts with Q348.a. Clashes disappeared after three steps with structure minimization of UCSF Chimera. |
|           | R5 (0.072): No Clash.                                                                                                      |
| K5-A428T  | R1 (0.876): Three contacts with I373.a and I377.a. Clashes disappeared after three steps.                                  |
|           | R2 (0.116): No clash.                                                                                                      |
|           | R3 (0.008): One contact with L425.b, Clashes disappeared when adding H-atoms.                                              |
| K5-A428V  | R1 (0.918): Two contacts with I373.a and I377.a. Clashes disappeared after six steps.                                      |
|           | R2 (0.052): Three contacts with L435.b, I373.a and I377.a. Clashes disappeared after three steps                           |
|           | R3 (0.030): One contact with L435.b. Clashes disappeared after three steps                                                 |
| K5-A438D  | R1 (0.570): No clash                                                                                                       |
|           | R2 (0.150): Two contacts with L384.a and R388.a. Clashes disappeared after 15 steps                                        |
|           | R3 (0.138): No clash                                                                                                       |
|           | R4 (0.053): One contact with R388.a. Clashes disappeared after three steps                                                 |
|           | R5 (0.034): One contact with E434.b. Clashes disappeared after three steps                                                 |
| K5-K443N  | R1 (0.450): No clash.                                                                                                      |
|           | R2 (0.143): No clash.                                                                                                      |
|           | R3 (0.094): No clash.                                                                                                      |
|           | R4 (0.061): No clash.                                                                                                      |
|           | R5 (0.057): No clash.                                                                                                      |
| K5-L463P  | R1 (0.832): Five contacts with T460.b and L460.b. Clashes disappeared after three steps                                    |
|           | R2 (0.168): Three contacts with T460.b and L460.b. Clashes disappeared after three steps                                   |
| K5-E466D* | R1 (0.478): One contact with Y470.b. Clashes disappeared after three steps                                                 |
|           | R2 (0.207): Five contacts with Y470.b. Clashes disappeared after 39 steps                                                  |
|           | R3 (0.145): One contact with Y470.b. Clashes disappeared after three steps                                                 |
|           | R4 (0.071): Six contacts with Y470.b. Clashes disappeared after nine steps                                                 |
|           | R5 (0.035): Six contacts with Y470.b. Clashes disappeared after 36 steps                                                   |
| K5-I467L  | R1 (0.47): Two contacts with Y415.a, and the structure cannot be accommodated after 50 steps                               |
|           | R2 (0.46): No clash.                                                                                                       |
|           | R3 (0.04): Three contacts with R471.b, and the structure cannot be accommodated after 50 steps                             |
|           | R4 (0.015): One contact with I412.a, and the structure cannot be accommodated after 50 steps                               |
|           | R5 (0.01): Six contacts with R471.b and Y415.a, and the structure cannot be accommodated after 50 steps                    |
| K5-I467M  | R1 (0.19): Two contacts with I412.a. Clashes disappeared after three steps                                                 |
|           | R2 (0.14): One contact with Y415.a, and the structure cannot be accommodated after 50 steps                                |
|           | R3 (0.12): Two contacts with R471.b. Clashes disappeared after three steps                                                 |
|           | R4 (0.11): Two contacts with L408.a. Clashes disappeared after three steps                                                 |
|           | R5 (0.10): Two contacts with E411.a. Clashes disappeared after three steps                                                 |
| K5-I467T  | R1 (0.966): No clash.                                                                                                      |
|           | R2 (0.031): No clash.                                                                                                      |
|           | R3 (0.003): No clash.                                                                                                      |
| K5-T469P  | R1 (0.531): Three contacts with V465.b. Clashes disappeared after 36 steps.                                                |
|           | R2 (0.169): Two contacts with V465.b. Clashes disappeared after six steps                                                  |
| K5-R471C  | R1 (0.546): No clash.                                                                                                      |
|           | R2 (0.424): No clash.                                                                                                      |
|           | R3 (0.030): No clash.                                                                                                      |
| K5-E475K  | R1 (0.415): No clash.                                                                                                      |
|           | R2 (0.138): No clash.                                                                                                      |
|           | R3 (0.100): No clash.                                                                                                      |
|           | R4 (0.059): No clash.                                                                                                      |
|           | R5 (0.056): No clash.                                                                                                      |
| K5-E475G  | No rotamer and no clash.                                                                                                   |
| K5-G476D  | R1 (0.309): No clash.                                                                                                      |

|           |                                                                                                                |
|-----------|----------------------------------------------------------------------------------------------------------------|
|           | R2 (0.195): No clash.                                                                                          |
|           | R3 (0.176): No clash.                                                                                          |
|           | R4 (0.110): No clash.                                                                                          |
|           | R5 (0.087): No clash.                                                                                          |
| K14-I377N | R1 (0.450): No clash.                                                                                          |
|           | R2 (0.143): One contact with L435.b. Clashes disappeared after three steps                                     |
|           | R3 (0.094): No clash.                                                                                          |
|           | R4 (0.061): Two contacts with L431.b and L435.b, and the structure cannot be accommodated after 50 steps       |
|           | R5 (0.057): One contact with L435.b, and the structure cannot be accommodated after 50 steps                   |
| K14-I377T | R1 (0.909): No clash.                                                                                          |
|           | R2 (0.078): No clash.                                                                                          |
|           | R3 (0.013): One contact with Q374.a. Clashes disappeared after three steps                                     |
| K14-E381K | R1 (0.272): No clash.                                                                                          |
|           | R2 (0.129): Three contacts with I377.a and K431.b. Clashes disappeared after 21 steps                          |
|           | R3 (0.084): No clash.                                                                                          |
|           | R4 (0.066): No clash.                                                                                          |
|           | R5 (0.057): No clash.                                                                                          |
| K14-L384P | R1 (0.724): Three contacts with V380.a, and the structure cannot be accommodated after 50 steps                |
|           | R2 (0.276): Eight contacts with V380.a and E381.a, and the structure cannot be accommodated after 50 steps     |
| K14-R388C | R1 (0.697): No clash.                                                                                          |
|           | R2 (0.233): No clash.                                                                                          |
|           | R3 (0.070): One contact with A385.a. Clashes disappeared after three steps                                     |
| K14-R388G | No rotamer and no clash.                                                                                       |
| K14-R388H | R1 (0.307): No clash.                                                                                          |
|           | R2 (0.177): One contact with L384.a. Clashes disappeared after three steps                                     |
|           | R3 (0.166): No clash.                                                                                          |
|           | R4 (0.160): No clash.                                                                                          |
|           | R5 (0.087): Two contacts with L384.a. Clashes disappeared after 15 steps                                       |
| K14-R388P | R1 (0.724): Five contacts with L384.a and A385.a, and the structure cannot be accommodated after 50 steps      |
|           | R2 (0.276): Eight contacts with L384.a and A385.a. Clashes disappeared after 18 steps                          |
| K14-L401P | R1 (0.915): Four contacts with E397.a and Y453.b, and the structure cannot be accommodated after 50 steps      |
|           | R2 (0.085): Four contacts with E397.a and Y398.a, and the structure cannot be accommodated after 50 steps      |
| K14-E411K | R1 (0.285): Five contacts with Y415.a and I467.b. Clashes disappeared after 18 steps                           |
|           | R2 (0.122): No clash.                                                                                          |
|           | R3 (0.083): Ten contacts with Y415.a and I467.b, and the structure cannot be accommodated after 50 steps       |
|           | R4 (0.067): Nine contacts with Y415.a and I467.b, and the structure cannot be accommodated after 50 steps      |
|           | R5 (0.049): Seven contacts with Y415.a and I467.b. Clashes disappeared after three steps                       |
| K14-I412F | R1 (0.776): Seventeen contacts with Y470.b and Y415.a, and the structure cannot be accommodated after 50 steps |
|           | R2 (0.135): Six contacts with L463.b, E466.b and I467.b. Clashes disappeared after 48 steps                    |
|           | R3 (0.039): Seventeen contacts with E409.a and Q410.a, and the structure cannot be accommodated after 50 steps |
|           | R4 (0.024): Eleven contacts with E409.a, and the structure cannot be accommodated after 50 steps               |
|           | R5 (0.016): Seventeen contacts with Y470.b and R416.a, and the structure cannot be accommodated after 50 steps |
| K14-I412N | R1 (0.369): No clash.                                                                                          |
|           | R2 (0.133): No clash.                                                                                          |
|           | R3 (0.125): No clash.                                                                                          |
|           | R4 (0.063): No clash.                                                                                          |
|           | R5 (0.059): No clash.                                                                                          |
| K14-A413T | R1 (0.515): One contact with E409.a. Clashes disappeared after six steps                                       |
|           | R2 (0.456): No clash.                                                                                          |
|           | R3 (0.029): One contact with Q410.a. Clashes disappeared after three steps                                     |
| K14-A413P | R1 (0.629): Ten contacts with E409.a, Q410.a and E411.a. Clashes disappeared after three steps                 |
|           | R2 (0.371): Seven contacts with E409.a and Q410.a. Clashes disappeared after 36 steps                          |
| K14-Y415H | R1 (0.495): Eleven contacts with Y470.b and L474.b. Clashes disappeared after 42 steps                         |
|           | R2 (0.185): Twelve contacts with Y470.b and L474.b, and the structure cannot be accommodated after 50 steps    |
|           | R3 (0.185): Twelve contacts with Y470.b and L474.b, and the structure cannot be accommodated after 50 steps    |
|           | R4 (0.074): No clash.                                                                                          |
|           | R5 (0.048): No clash.                                                                                          |
| K14-Y415C | R1 (0.545): No clash.                                                                                          |
|           | R2 (0.424): One contact with Y 470.b. Clashes disappeared after three steps                                    |

|           |                                                                                                 |
|-----------|-------------------------------------------------------------------------------------------------|
|           | R3 (0.030): One contact with I412.a. Clashes disappeared after three steps                      |
| K14-R416P | R1 (0.707): Three contacts with I412.a, and the structure cannot be accommodated after 50 steps |
|           | R2 (0.293): Three contacts with I412.a, and the structure cannot be accommodated after 50 steps |
| K14-R417P | R1 (0.850): Twelve contacts with A413.a, T414.a and Y415.a. Clashes disappeared after six steps |
|           | R2 (0.150): Ten contacts with A413.a, T414.a and Y415.a. Clashes disappeared after 36 steps     |
| K14-L418V | R1 (0.524): No clash.                                                                           |
|           | R2 (0.298): No clash.                                                                           |
|           | R3 (0.177): No clash.                                                                           |
| K14-L419Q | R1 (0.229): No clash.                                                                           |
|           | R2 (0.124): No clash.                                                                           |
|           | R3 (0.123): No clash.                                                                           |
|           | R4 (0.087): Three contacts with L474.b. Clashes disappeared after six steps                     |
|           | R5 (0.083): No clash.                                                                           |

#1: We only select top five rotamers of each point mutation.

#2: K5-E466D\*: there is a default clash: E466.b O---2.542---Y470.b CD<sub>2</sub>.

#3: R1 (0.229) denotes the first rotamer and corresponding probability is 22.9%.
